# Supplementary material for: Troponin I and T in relation to cardiac injury detected with electrocardiography in a population-based cohort - The Maastricht Study
Source: PubMed Central journal article supplement (PMC5529453; doi:10.1038/s41598-017-06978-3), 2017-07-26
Supplement: 41598_2017_6978_MOESM1_ESM.pdf [file 41598_2017_6978_MOESM1_ESM.pdf]

## Supplementary File

### **Troponin I and T in relation to cardiac injury detected with electrocardiography in a population-based cohort - The Maastricht Study**

Dorien M. Kimenai<sup>1,2</sup>, Remy J.H. Martens<sup>3,4</sup>, Jeroen P. Kooman<sup>3,4</sup>, Coen D.A. Stehouwer<sup>2,5,6</sup>, Frans E.S. Tan<sup>7</sup>, Nicolaas C. Schaper<sup>2,5</sup>, Pieter C. Dagnelie<sup>2,6,8</sup>, Miranda T. Schram<sup>2,5,9</sup>, Carla J.H. van der Kallen<sup>2,5</sup>, Simone J.S. Sep<sup>2,5</sup>, Jeroen D.E. van Suijlen<sup>10</sup>, Abraham A. Kroon<sup>2,5</sup>, Otto Bekers<sup>1,2</sup>, Marja P. van Dieijen-Visser<sup>1,2</sup>, Ronald M.A. Henry<sup>2,5,9</sup>, Steven J.R. Meex<sup>1,2</sup>

<sup>1</sup>Department of Clinical Chemistry, Central Diagnostic Laboratory, Maastricht University Medical Center+ (MUMC+), Maastricht, the Netherlands; <sup>2</sup>CARIM School for Cardiovascular Diseases, Maastricht University, Maastricht, the Netherlands; <sup>3</sup>Department of Internal Medicine, Division of Nephrology, MUMC+, Maastricht, the Netherlands; <sup>4</sup>NUTRIM School of Nutrition and Translational Research in Metabolism, Maastricht University, Maastricht, the Netherlands; <sup>5</sup>Department of Internal Medicine, MUMC+, Maastricht, the Netherlands; <sup>6</sup>CAPHRI School for Public Health and Primary Care, Maastricht University, Maastricht, the Netherlands; <sup>7</sup>Department of Methodology and Statistics, Maastricht University, Maastricht, the Netherlands; <sup>8</sup>Department of Epidemiology, MUMC+, Maastricht, the Netherlands; <sup>9</sup>Heart and Vascular Centre, MUMC+, Maastricht, the Netherlands; <sup>10</sup>Department of Clinical Chemistry, Gelre Hospital, Apeldoorn, the Netherlands

## Supplemental Figures

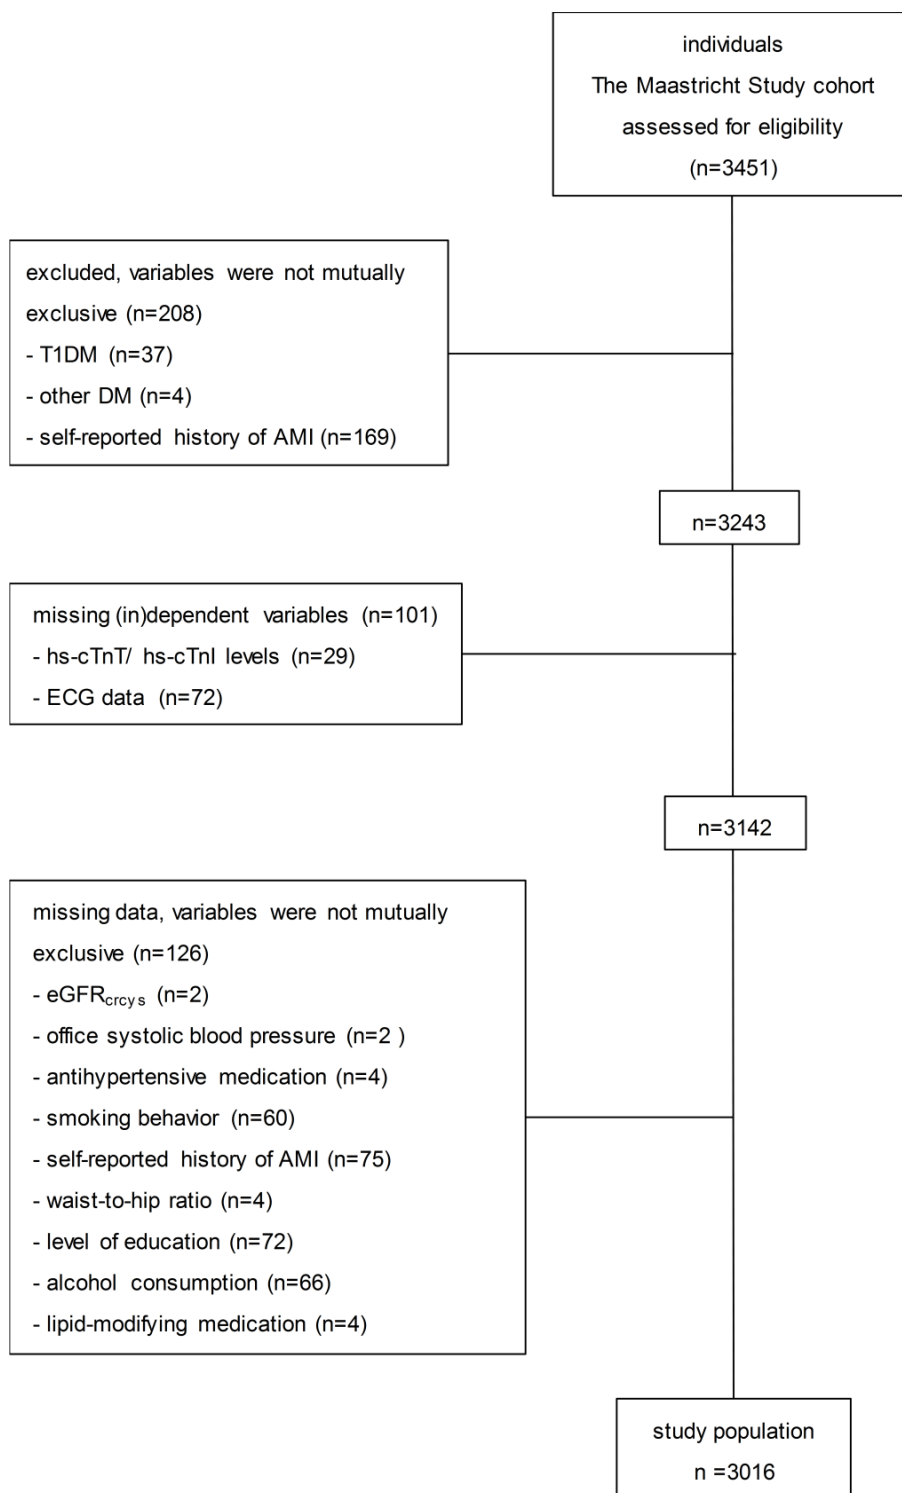

**Figure S1.** Study flow diagram. Abbreviations: AMI, acute myocardial infarction; DM, diabetes mellitus; eGFR, estimated Glomerular Filtration Rate; ECG, electrocardiographic; hs-cTnI, high-sensitivity cardiac troponin I; hs-cTnT, high-sensitivity cardiac troponin T; T1DM, type 1 diabetes mellitus.

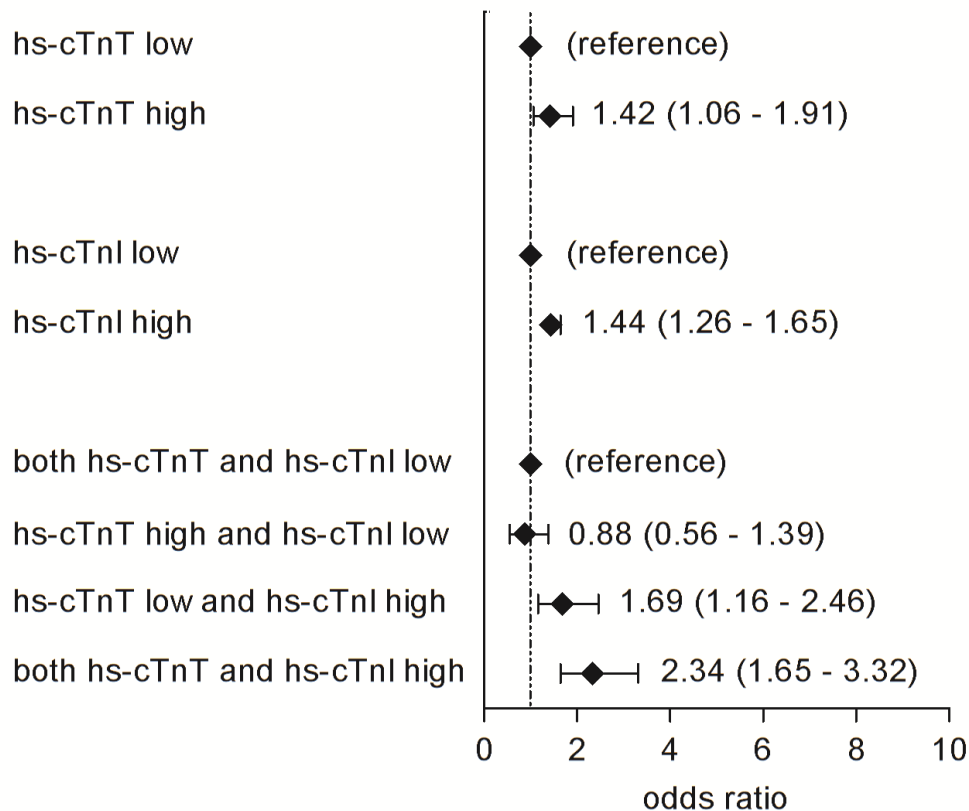

**Figure S2.** Associations between combined hs-cTn categories and liberal definition of ECG changes indicative of cardiac abnormalities. Definitions of “low” and “high” hs-cTn categories were based on the sex-specific 75th percentiles of hs-cTnI and hs-cTnT (hs-cTnI, women: 2.20 ng/L; hs-cTnI, men: 3.70 ng/L; hs-cTnT, women: 5.55 ng/L; hs-cTnT, men: 9.36 ng/L). Category “low” included participants with hs-cTn levels < the sex-specific 75th percentile and category “high” included participants  $\geq$  the sex-specific 75th percentile. Model was adjusted for sex, age, glucose metabolism status, eGFR, smoking behavior, total-to-HDL cholesterol ratio, triglyceride levels, lipid-modifying medication, office systolic blood pressure, antihypertensive medication, waist-to-hip ratio, alcohol consumption and educational level. Abbreviations: ECG, electrocardiographic; eGFR, estimated Glomerular Filtration Rate; HDL, high-density lipoprotein; hs-cTnI, high-sensitivity cardiac troponin I; hs-cTnT, high-sensitivity cardiac troponin T.

## Supplemental Tables

**Table S1. Prevalence of Minnesota coding categories of ECG abnormalities of the total study population**

| <b>Minnesota coding</b> | <b>description</b>                              | <b>N (%)</b> |
|-------------------------|-------------------------------------------------|--------------|
| 1.1.1 – 1.2.8           | major or medium abnormalities in Q/ QS patterns | 78 (2.6%)    |
| 1.3.1, 1.3.2            | borderline abnormalities in Q/QS patterns       | 65 (2.2%)    |
| 4.1.1, 4.1.2, 4.2, 4.3  | ST-segment abnormalities                        | 82 (2.7%)    |
| 5.1, 5.2, 5.3           | abnormal T-waves                                | 310 (10.3%)  |
| 7.1.1, 7.1.2            | left bundle branch block                        | 28 (0.9%)    |

Data are reported as n (%)

**Table S2. Associations of hs-cTnl and hs-cTnT with ECG changes indicative of cardiac abnormalities**

|               | hs-cTnl           |                 | hs-cTnT           |                 |
|---------------|-------------------|-----------------|-------------------|-----------------|
|               | ln, 1-SD increase |                 | ln, 1-SD increase |                 |
|               | OR (95% CI)       | <i>p</i> -value | OR (95% CI)       | <i>p</i> -value |
| <b>LoD</b>    |                   |                 |                   |                 |
| model 1       | 1.52 (1.33-1.73)  | < 0.001         | 1.42 (1.23-1.65)  | < 0.001         |
| model 2       | 1.51 (1.31-1.75)  | < 0.001         | 1.32 (1.11-1.58)  | 0.002           |
| model 3       | 1.54 (1.33-1.77)  | < 0.001         | 1.38 (1.15-1.66)  | 0.001           |
| model 4A      | 1.52 (1.31-1.76)  | < 0.001         | 1.35 (1.11-1.63)  | 0.002           |
| model 4B      | 1.61 (1.38-1.89)  | < 0.001         | 1.35 (1.10-1.65)  | 0.004           |
| <b>20% CV</b> |                   |                 |                   |                 |
| model 1       | 1.56 (1.36-1.80)  | < 0.001         | 1.33 (1.17-1.52)  | < 0.001         |
| model 2       | 1.56 (1.33-1.82)  | < 0.001         | 1.23 (1.06-1.43)  | 0.007           |
| model 3       | 1.58 (1.35-1.85)  | < 0.001         | 1.27 (1.08-1.48)  | 0.003           |
| model 4A      | 1.56 (1.32-1.83)  | < 0.001         | 1.25 (1.06-1.47)  | 0.007           |
| model 4B      | 1.67 (1.41-1.98)  | < 0.001         | 1.23 (1.04-1.47)  | 0.019           |
| <b>10% CV</b> |                   |                 |                   |                 |
| model 1       | 1.29 (1.17-1.43)  | < 0.001         | 1.12 (0.99-1.27)  | 0.069           |
| model 2       | 1.30 (1.16-1.44)  | < 0.001         | 1.06 (0.93-1.22)  | 0.386           |
| model 3       | 1.30 (1.17-1.45)  | < 0.001         | 1.07 (0.93-1.23)  | 0.325           |
| model 4A      | 1.30 (1.17-1.46)  | < 0.001         | 1.07 (0.93-1.23)  | 0.344           |
| model 4B      | 1.34 (1.20-1.50)  | < 0.001         | 1.06 (0.92-1.23)  | 0.412           |
| <b>LoQ</b>    |                   |                 |                   |                 |
| model 1       | 1.24 (1.13-1.37)  | < 0.001         | 1.12 (0.99-1.27)  | 0.069           |
| model 2       | 1.25 (1.13-1.38)  | < 0.001         | 1.06 (0.93-1.22)  | 0.386           |
| model 3       | 1.26 (1.14-1.39)  | < 0.001         | 1.07 (0.93-1.23)  | 0.325           |
| model 4A      | 1.26 (1.13-1.39)  | < 0.001         | 1.07 (0.93-1.23)  | 0.344           |
| model 4B      | 1.29 (1.16-1.43)  | < 0.001         | 1.06 (0.92-1.23)  | 0.412           |

Hs-cTn values below the lower limits of measurement were set equal to the LoD, 20% CV, 10% CV and LoQ, respectively. Hs-cTnI, LoD: 1.7 ng/L, 20% CV: 1.3 ng/L, 10% CV: 4.7 ng/L, LoQ: 6.7 ng/L; hs-cTnT, LoD: 5 ng/L, 20% CV: 6.8 ng/L, 10% CV: 13 ng/L, LoQ: 13 ng/L. For hs-cTnI a LoD value of 1.7 ng/L and LoQ value of 6.7 ng/L was chosen to obtain similar proportions for troponin I and T of participants with values above the LoD and LoQ, respectively. Model 1: crude model; model 2: model 1 + sex, age, glucose metabolism status; model 3: model 2 + eGFR; model 4A: model 3 + smoking behavior, total-to-HDL cholesterol ratio, triglyceride levels, lipid-modifying medication, office systolic blood pressure, antihypertensive medication, waist-to-hip ratio, alcohol consumption, educational level; model 4B: model 4A with replacement of office systolic blood pressure by 24h average ambulatory systolic blood pressure. Abbreviations: CV, coefficient of variation; ECG, electrocardiographic; eGFR, estimated Glomerular Filtration Rate; HDL, high-density lipoprotein; hs-cTnI, high-sensitivity cardiac troponin I; hs-cTnT, high-sensitivity cardiac troponin T; LoD, limit of detection; LoQ, limit of quantitation.

**Table S3. Associations of hs-cTnI and hs-cTnT with liberal definition of ECG changes indicative of cardiac abnormalities**

|          | hs-cTnI           |                 | hs-cTnT           |                 |
|----------|-------------------|-----------------|-------------------|-----------------|
|          | ln, 1-SD increase |                 | ln, 1-SD increase |                 |
|          | OR (95% CI)       | <i>p</i> -value | OR (95% CI)       | <i>p</i> -value |
| model 1  | 1.54 (1.37-1.73)  | < 0.001         | 1.40 (1.24-1.59)  | < 0.001         |
| model 2  | 1.52 (1.34-1.73)  | < 0.001         | 1.33 (1.13-1.55)  | < 0.001         |
| model 3  | 1.52 (1.33-1.72)  | < 0.001         | 1.32 (1.12-1.56)  | 0.001           |
| model 4A | 1.48 (1.30-1.69)  | < 0.001         | 1.26 (1.06-1.49)  | 0.007           |
| model 4B | 1.50 (1.30-1.72)  | < 0.001         | 1.29 (1.08-1.54)  | 0.006           |

Model 1: crude model; model 2: model 1 + sex, age, glucose metabolism status; model 3: model 2 + eGFR; model 4A: model 3 + smoking behavior, total-to-HDL cholesterol ratio, triglyceride levels, lipid-modifying medication, office systolic blood pressure, antihypertensive medication, waist-to-hip ratio, alcohol consumption, educational level; model 4B: model 4A with replacement of office systolic blood pressure by 24h average ambulatory systolic blood pressure. Abbreviations: ECG, electrocardiographic; eGFR, estimated Glomerular Filtration Rate; HDL, high-density lipoprotein; hs-cTnI, high-sensitivity cardiac troponin I; hs-cTnT, high-sensitivity cardiac troponin T.

**Table S4. Clinical characteristics stratified by hs-cTnI categories based on the sex-specific 75<sup>th</sup> percentiles and sex-specific 99<sup>th</sup> percentiles**

| variable                            | hs-cTnI < sex-specific       | hs-cTnI ≥ sex-specific       | hs-cTnI < sex-specific       | hs-cTnI ≥ sex-specific       |
|-------------------------------------|------------------------------|------------------------------|------------------------------|------------------------------|
|                                     | 75 <sup>th</sup> percentiles | 75 <sup>th</sup> percentiles | 99 <sup>th</sup> percentiles | 99 <sup>th</sup> percentiles |
|                                     | (n = 2278)                   | (n = 738)                    | (n = 2987)                   | (n = 29)                     |
| age (years)                         | 59 (8)                       | 63 (7)                       | 60 (8)                       | 62 (9)                       |
| sex (male)                          | 1151 (50.5%)                 | 375 (50.8%)                  | 1511 (50.6%)                 | 15 (51.7%)                   |
| BMI (kg/m <sup>2</sup> )            | 26.5 (4.3)                   | 28.0 (4.9)                   | 26.9 (4.5)                   | 26.0 (3.7)                   |
| eGFR                                |                              |                              |                              |                              |
| < 60 mL/min/1.73m <sup>2</sup>      | 48 (2.1%)                    | 61 (8.3%)                    | 106 (3.5%)                   | 3 (10.3%)                    |
| 60 - > 90 mL/min/1.73m <sup>2</sup> | 1022 (44.9%)                 | 416 (56.4%)                  | 1419 (47.5%)                 | 19 (65.5%)                   |
| ≥ 90 mL/min/1.73m <sup>2</sup>      | 1208 (53.0%)                 | 261 (35.4%)                  | 1462 (48.9%)                 | 7 (24.1%)                    |
| glucose metabolism                  |                              |                              |                              |                              |
| NGM                                 | 1394 (61.2%)                 | 382 (51.8%)                  | 1759 (58.9%)                 | 17 (58.6%)                   |
| IFG                                 | 105 (4.6%)                   | 24 (3.3%)                    | 129 (4.3%)                   | 0 (0%)                       |
| IGT                                 | 237 (10.4%)                  | 93 (12.6%)                   | 326 (10.9%)                  | 4 (13.8%)                    |
| T2DM                                | 542 (23.8%)                  | 239 (32.4%)                  | 773 (25.9%)                  | 8 (27.6%)                    |
| office BP, systolic (mmHg)          | 133 (17)                     | 140 (20)                     | 135 (18)                     | 142 (8)                      |
| office BP, diastolic (mmHg)         | 76 (10)                      | 77 (11)                      | 76 (10)                      | 77 (11)                      |



|                                   |               |                |               |                  |
|-----------------------------------|---------------|----------------|---------------|------------------|
| hypertension (yes)                | 1098 (48.2%)  | 530 (71.8%)    | 1609 (53.9%)  | 19 (65.5%)       |
| antihypertensive medication (yes) | 717 (31.5%)   | 391 (53.0%)    | 1095 (36.7%)  | 13 (44.8%)       |
| smoking behavior                  |               |                |               |                  |
| never                             | 813 (35.7%)   | 277 (37.5%)    | 1078 (36.1%)  | 12 (41.4%)       |
| former                            | 1151 (50.5%)  | 374 (50.7%)    | 1508 (50.5%)  | 17 (58.6%)       |
| current                           | 314 (13.8%)   | 87 (11.8%)     | 401 (13.4%)   | 0 (0%)           |
| total-to-HDL cholesterol ratio    | 3.4 (2.8-4.3) | 3.6 (2.8-4.3)  | 3.5 (2.8-4.3) | 3.2 (2.8-4.3)    |
| triglycerides (mmol/L)            | 1.2 (0.9-1.7) | 1.3 (0.9-1.8)  | 1.2 (0.9-1.7) | 1.0 (0.9-1.4)    |
| lipid-modifying medication (yes)  | 682 (29.9%)   | 310 (42.0%)    | 984 (32.9%)   | 8 (27.6%)        |
| hs-cTnI (ng/L)                    | 1.5 (1.1-2.1) | 4.3 (3.1-6.6)  | 1.9 (1.2-2.9) | 27.9 (20.3-57.0) |
| hs-cTnT (ng/L)                    | 4.8 (3.5-6.7) | 7.8 (5.5-11.1) | 5.3 (3.7-7.7) | 11.7 (6.4-17.2)  |

---

Sex-specific 75th percentiles of hs-cTnI: women, 2.20 ng/l; men, 3.70 ng/l. Sex-specific 99th percentiles of hs-cTnI: women, 13.15 ng/l; men, 25.56 ng/l.

Continuous variables are expressed as mean (SD) or median (IQR) depending on their distribution. Categorical data are reported as n (%). Abbreviations: BP, blood pressure; BMI, Body Mass Index; eGFR, estimated Glomerular Filtration Rate; HDL, high-density lipoprotein; hs-cTnI, high-sensitivity cardiac troponin I; NGM, normal glucose metabolism; IFG, impaired fasting glucose; IGT, impaired glucose tolerance; T2DM, type 2 diabetes mellitus.

**Table S5. Clinical characteristics stratified by hs-cTnT categories based on the sex-specific 75<sup>th</sup> percentiles and sex-specific 99<sup>th</sup> percentiles**

| variable                            | hs-cTnT < sex-specific       | hs-cTnT ≥ sex-specific       | hs-cTnT < sex-specific       | hs-cTnT ≥ sex-specific       |
|-------------------------------------|------------------------------|------------------------------|------------------------------|------------------------------|
|                                     | 75 <sup>th</sup> percentiles | 75 <sup>th</sup> percentiles | 99 <sup>th</sup> percentiles | 99 <sup>th</sup> percentiles |
|                                     | (n = 2266)                   | (n = 750)                    | (n = 2987)                   | (n = 29)                     |
| age (years)                         | 58 (8)                       | 64 (7)                       | 60 (8)                       | 66 (7)                       |
| sex (male)                          | 1147 (50.6%)                 | 379 (50.5%)                  | 1511 (50.6%)                 | 15 (51.7%)                   |
| BMI (kg/m <sup>2</sup> )            | 26.5 (4.2)                   | 28.2 (5.1)                   | 26.9 (4.5)                   | 27.9 (6.1)                   |
| eGFR                                |                              |                              |                              |                              |
| < 60 mL/min/1.73m <sup>2</sup>      | 27 (1.2%)                    | 82 (10.9%)                   | 98 (3.3%)                    | 11 (37.9%)                   |
| 60 - > 90 mL/min/1.73m <sup>2</sup> | 958 (42.3%)                  | 480 (64.0%)                  | 1420 (47.5%)                 | 18 (62.1%)                   |
| ≥ 90 mL/min/1.73m <sup>2</sup>      | 1281 (56.5%)                 | 188 (25.1%)                  | 1469 (49.2%)                 | 0 (0%)                       |
| glucose metabolism                  |                              |                              |                              |                              |
| NGM                                 | 1467 (64.7%)                 | 309 (41.2%)                  | 1769 (59.2%)                 | 7 (24.1%)                    |
| IFG                                 | 97 (4.3%)                    | 32 (4.3%)                    | 129 (4.3%)                   | 0 (0%)                       |
| IGT                                 | 239 (10.5%)                  | 91 (12.1%)                   | 328 (11.0%)                  | 2 (6.9%)                     |
| T2DM                                | 463 (20.4%)                  | 318 (42.4%)                  | 761 (25.5%)                  | 20 (69.0%)                   |
| office BP, systolic (mmHg)          | 133 (17)                     | 139 (19)                     | 135 (18)                     | 140 (23)                     |
| office BP, diastolic (mmHg)         | 76 (10)                      | 76 (10)                      | 76(10)                       | 72 (11)                      |

|                                   |               |                 |               |                  |
|-----------------------------------|---------------|-----------------|---------------|------------------|
| hypertension (yes)                | 1082 (47.7%)  | 546 (72.8%)     | 1604 (53.7%)  | 24 (82.8%)       |
| antihypertensive medication (yes) | 670 (29.6%)   | 438 (58.4%)     | 1087 (36.4%)  | 21 (72.4%)       |
| smoking behavior                  |               |                 |               |                  |
| never                             | 821 (36.2%)   | 269 (35.9%)     | 1081 (36.2%)  | 9 (31.0%)        |
| former                            | 1133 (50.0%)  | 392 (52.3%)     | 1507 (50.5%)  | 18 (62.1%)       |
| current                           | 312 (13.8%)   | 89 (11.9%)      | 399 (13.4%)   | 2 (6.9%)         |
| total-to-HDL cholesterol ratio    | 3.5 (2.8-4.3) | 3.5 (2.8-4.3)   | 3.5 (2.8-4.3) | 3.7 (2.7-4.3)    |
| triglycerides (mmol/L)            | 1.2 (0.9-1.6) | 1.3 (1.0-1.8)   | 1.2 (0.9-1.7) | 1.4 (1.0-2.5)    |
| lipid-modifying medication (yes)  | 615 (27.1%)   | 377 (50.3%)     | 980 (32.8%)   | 12 (41.4%)       |
| hs-cTnI (ng/L)                    | 1.6 (1.1-2.4) | 3.0 (1.9-5.1)   | 1.9 (1.2-2.9) | 4.6 (3.1-16.0)   |
| hs-cTnT (ng/L)                    | 4.5 (3.5-5.9) | 10.1 (7.1-12.9) | 5.3 (3.7-7.6) | 33.9 (29.5-50.5) |

---

Sex-specific 75th percentiles of hs-cTnT: women, 5.55 ng/l; men, 9.36 ng/l. Sex-specific 99th percentiles of hs-cTnT: women, 16.28 ng/l; men, 29.50 ng/l.

Continuous variables are expressed as mean (SD) or median (IQR) depending on their distribution. Categorical data are reported as n (%). Abbreviations: BP, blood pressure; BMI, Body Mass Index; eGFR, estimated Glomerular Filtration Rate; HDL, high-density lipoprotein; hs-cTnT, high-sensitivity cardiac troponin T; NGM, normal glucose metabolism; IFG, impaired fasting glucose; IGT, impaired glucose tolerance; T2DM, type 2 diabetes mellitus.

**Table S6. Associations between combined hs-cTn categories and ECG changes indicative of cardiac abnormalities**

| threshold                   | hs-cTn categories             | n    | OR (95% CI)      | p-value |
|-----------------------------|-------------------------------|------|------------------|---------|
| 66 <sup>th</sup> percentile | both hs-cTnT and hs-cTnI low  | 1526 | reference        |         |
|                             | hs-cTnT high and hs-cTnI low  | 381  | 0.98 (0.43-2.22) | 0.953   |
|                             | hs-cTnT low and hs-cTnI high  | 444  | 1.67 (0.86-3.25) | 0.129   |
|                             | both hs-cTnT and hs-cTnI high | 625  | 3.32 (1.91-5.77) | < 0.001 |
| 70 <sup>th</sup> percentile | both hs-cTnT and hs-cTnI low  | 1692 | reference        |         |
|                             | hs-cTnT high and hs-cTnI low  | 360  | 1.02 (0.46-2.30) | 0.955   |
|                             | hs-cTnT low and hs-cTnI high  | 418  | 1.74 (0.90-3.34) | 0.098   |
|                             | both hs-cTnT and hs-cTnI high | 546  | 3.57 (2.07-6.16) | < 0.001 |
| 80 <sup>th</sup> percentile | both hs-cTnT and hs-cTnI low  | 2093 | reference        |         |
|                             | hs-cTnT high and hs-cTnI low  | 296  | 1.24 (0.58-2.68) | 0.577   |
|                             | hs-cTnT low and hs-cTnI high  | 320  | 2.35 (1.27-4.34) | 0.006   |
|                             | both hs-cTnT and hs-cTnI high | 370  | 3.92 (2.20-6.97) | < 0.001 |
| 90 <sup>th</sup> percentile | both hs-cTnT and hs-cTnI low  | 2524 | reference        |         |
|                             | hs-cTnT high and hs-cTnI low  | 182  | 1.34 (0.60-2.96) | 0.477   |
|                             | hs-cTnT low and hs-cTnI high  | 191  | 2.53 (1.34-4.80) | 0.004   |
|                             | both hs-cTnT and hs-cTnI high | 119  | 3.83 (1.90-7.72) | < 0.001 |

Definitions of “low” and “high” hs-cTn categories were based on sex-specific 66<sup>th</sup> percentiles of hs-cTnI and hs-cTnT (hs-cTnI, women: 1.80 ng/L; hs-cTnI, men: 3.10 ng/L; hs-cTnT, women: 4.95 ng/L; hs-cTnT, men: 8.34 ng/L), 70<sup>th</sup> percentiles (hs-cTnI, women: 1.90 ng/L; hs-cTnI, men: 3.30 ng/L; hs-cTnT, women: 5.18 ng/L; hs-cTnT, men: 8.68 ng/L), 80<sup>th</sup> percentiles (hs-cTnI, women: 2.40 ng/L; hs-cTnI, men: 4.00 ng/L; hs-cTnT, women: 5.93 ng/L; hs-cTnT, men: 10.17 ng/L) and 90<sup>th</sup> percentiles (hs-cTnT, women: 7.68 ng/L; hs-cTnI, women: 3.50 ng/L; hs-cTnI, men: 6.30 ng/L; hs-cTnT, men: 12.83 ng/L). Category “low” included participants with hs-cTn levels < the respective percentile and category “high” included participants ≥ the respective percentile. Model was adjusted for sex, age, glucose metabolism status, eGFR, smoking behavior, total-to-HDL cholesterol ratio, triglyceride levels, lipid-modifying medication, office systolic blood pressure, antihypertensive medication, waist-to-hip ratio, alcohol

consumption and educational level. Abbreviations: ECG, electrocardiographic; eGFR, estimated Glomerular Filtration Rate; HDL, high-density lipoprotein; hs-cTnl, high-sensitivity cardiac troponin I; hs-cTnT, high-sensitivity cardiac troponin T.

**Table S7. Clinical characteristics stratified by combined hs-cTn categories based on the sex-specific 75<sup>th</sup> percentiles**

| variable                            | hs-cTnT and hs-cTnI low<br>(n = 1934) | hs-cTnT high and hs-cTnI low<br>(n = 344) | hs-cTnT low and hs-cTnI high<br>(n = 332) | hs-cTnT and hs-cTnI high<br>(n = 406) |
|-------------------------------------|---------------------------------------|-------------------------------------------|-------------------------------------------|---------------------------------------|
| age (years)                         | 58 (8)                                | 63 (7)                                    | 60 (8)                                    | 65 (7)                                |
| sex (male)                          | 979 (50.6%)                           | 172 (50.0%)                               | 168 (50.6%)                               | 207 (51.0%)                           |
| BMI (kg/m <sup>2</sup> )            | 26.3 (4.1)                            | 27.7 (4.8)                                | 27.3 (4.4)                                | 28.7 (5.3)                            |
| eGFR                                |                                       |                                           |                                           |                                       |
| < 60 mL/min/1.73m <sup>2</sup>      | 22 (1.1%)                             | 26 (7.6%)                                 | 5 (1.5%)                                  | 56 (13.8%)                            |
| 60 - > 90 mL/min/1.73m <sup>2</sup> | 809 (41.8%)                           | 213 (61.9%)                               | 149 (44.9%)                               | 267 (65.8%)                           |
| ≥ 90 mL/min/1.73m <sup>2</sup>      | 1103 (57.0%)                          | 105 (30.5%)                               | 178 (53.6%)                               | 83 (20.4%)                            |
| glucose metabolism                  |                                       |                                           |                                           |                                       |
| NGM                                 | 1253 (64.8%)                          | 141 (41.0%)                               | 214 (64.5%)                               | 168 (41.4%)                           |
| IFG                                 | 90 (4.7%)                             | 15 (4.4%)                                 | 7 (2.1%)                                  | 17 (4.2%)                             |
| IGT                                 | 196 (10.1%)                           | 41 (11.9%)                                | 43 (13.0%)                                | 50 (12.3%)                            |
| T2DM                                | 395 (20.4%)                           | 147 (42.7%)                               | 68 (20.5%)                                | 171 (42.1%)                           |
| office BP, systolic (mmHg)          | 132 (17)                              | 136 (17)                                  | 139 (19)                                  | 142 (20)                              |
| office BP, diastolic (mmHg)         | 76 (10)                               | 76 (10)                                   | 78 (11)                                   | 76 (11)                               |
| hypertension (yes)                  | 870 (45.0%)                           | 228 (66.3%)                               | 212 (63.9%)                               | 318 (78.3%)                           |
| antihypertensive medication (yes)   | 531 (27.5%)                           | 186 (54.1%)                               | 139 (41.9%)                               | 252 (62.1%)                           |

|                                  |               |                |               |                 |
|----------------------------------|---------------|----------------|---------------|-----------------|
| smoking behavior                 |               |                |               |                 |
| never                            | 704 (36.4%)   | 109 (31.7%)    | 117 (35.2%)   | 160 (39.4%)     |
| former                           | 959 (49.6%)   | 192 (55.8%)    | 174 (52.4%)   | 200 (49.3%)     |
| current                          | 271 (14.0%)   | 43 (12.5%)     | 41 (12.3%)    | 46 (11.3%)      |
| total-to-HDL cholesterol ratio   | 3.4 (2.8-4.3) | 3.4 (2.8-4.3)  | 3.6 (3.0-4.3) | 3.5 (2.8-4.3)   |
| triglycerides (mmol/L)           | 1.2 (0.9-1.6) | 1.3 (1.0-1.8)  | 1.2 (0.9-1.7) | 1.3 (1.0-1.9)   |
| lipid-modifying medication (yes) | 511 (26.4%)   | 171 (49.7%)    | 104 (31.3%)   | 206 (50.7%)     |
| hs-cTnI (ng/L)                   | 1.5 (1.1-2.0) | 1.9 (1.4-2.5)  | 4.0 (2.9-5.5) | 4.7 (3.5-7.4)   |
| hs-cTnT (ng/L)                   | 4.3 (3.2-5.7) | 9.8 (6.6-11.9) | 5.3 (4.3-7.4) | 10.6 (7.8-14.0) |

---

Definitions of “low” and “high” hs-cTn categories were based on the sex-specific 75th percentiles of hs-cTnI and hs-cTnT (hs-cTnI, women: 2.20 ng/L; hs-cTnI, men: 3.70 ng/L; hs-cTnT, women: 5.55 ng/L; hs-cTnT, men: 9.36 ng/L). Category “low” included participants with hs-cTn levels < the sex-specific 75th percentile and category “high” included participants ≥ the sex-specific 75th percentile. Continuous variables are expressed as mean (SD) or median (IQR) depending on their distribution. Categorical data are reported as n (%). Abbreviations: BP, blood pressure; BMI, Body Mass Index; eGFR, estimated Glomerular Filtration Rate; HDL, high-density lipoprotein; hs-cTnI, high-sensitivity cardiac troponin I; hs-cTnT, high-sensitivity cardiac troponin T; NGM, normal glucose metabolism; IFG, impaired fasting glucose; IGT, impaired glucose tolerance; T2DM, type 2 diabetes mellitus.

**Table S8. Characteristics and main findings of studies investigating hs-cTnI and hs-cTnT in relation to clinical outcome under non-acute conditions**

| publication                  | time period                              | population                           | total no<br>included | sex (male)   | correlation<br>or concordance<br>hs-cTnI/hs-cTnT | outcome                                                                                    |
|------------------------------|------------------------------------------|--------------------------------------|----------------------|--------------|--------------------------------------------------|--------------------------------------------------------------------------------------------|
| Omland 2013 <sup>19</sup>    | 1996-2000,<br>median follow-up 5.2 years | low-risk patients<br>with stable CAD | 3623                 | 2933 (81.0%) | r = 0.44                                         | CVD mortality or<br>heart failure, nonfatal AMI                                            |
| Hijazi 2015 <sup>20</sup>    | 2006-2010,<br>median follow-up 1.9 years | AF patients                          | 14806                | 9517 (64.3%) | r = 0.70                                         | stroke or systemic embolism,<br>all-cause mortality, CVD mortality, AMI,<br>major bleeding |
| deFilippi 2012 <sup>21</sup> | 2006-2007,<br>median follow-up 4.8 years | patients with<br>stable CKD          | 148                  | 102 (68.9%)  | $\kappa$ = 0.40                                  | CAC, LVMI                                                                                  |



**Table S8 (continued)**

| <b>publication</b>        | <b>main findings</b>                                             |                    |
|---------------------------|------------------------------------------------------------------|--------------------|
| Omland 2013 <sup>19</sup> | <b>outcome and groups*</b>                                       | <b>HR (95% CI)</b> |
|                           | <b>CVD mortality or heart failure</b>                            |                    |
|                           | both hs-cTnT and hs-cTnI low (reference category)                |                    |
|                           | (hs-cTnT high and hs-cTnI low) or (hs-cTnT high and hs-cTnI low) | 2.25 (1.18-4.28)   |
|                           | hs-cTnT and hs-cTnI high                                         | 7.57 (4.30-13.35)  |
|                           | <b>non-fatal AMI</b>                                             |                    |
|                           | both hs-cTnT and hs-cTnI low (reference category)                |                    |
|                           | (hs-cTnT high and hs-cTnI low) or (hs-cTnT high and hs-cTnI low) | 0.96 (0.66-1.39)   |
|                           | hs-cTnT and hs-cTnI high                                         | 1.10 (0.79-1.55)   |
| Hijazi 2015 <sup>20</sup> | <b>outcome and groups**</b>                                      | <b>HR (95% CI)</b> |
|                           | <b>stroke or systemic embolism</b>                               |                    |
|                           | both hs-cTnT and hs-cTnI low (reference category)                |                    |
|                           | hs-cTnT high and hs-cTnI low                                     | 1.35 (0.93-1.97)   |
|                           | hs-cTnT high and hs-cTnI low                                     | 1.21 (0.83-1.74)   |
|                           | hs-cTnT and hs-cTnI high                                         | 1.72 (1.31-2.27)   |

**Table S8 (continued)**

| <b>publication</b>        | <b>main findings</b>                              |                    |
|---------------------------|---------------------------------------------------|--------------------|
| Hijazi 2015 <sup>20</sup> | <b>outcome and groups**</b>                       | <b>HR (95% CI)</b> |
|                           | <b>all-cause mortality</b>                        |                    |
|                           | both hs-cTnT and hs-cTnl low (reference category) |                    |
|                           | hs-cTnT high and hs-cTnl low                      | 1.19 (0.90-1.57)   |
|                           | hs-cTnT high and hs-cTnl low                      | 1.51 (1.17-1.95)   |
|                           | hs-cTnT and hs-cTnl high                          | 2.32 (1.91-2.80)   |
|                           | <b>CVD mortality</b>                              |                    |
|                           | both hs-cTnT and hs-cTnl low (reference category) |                    |
|                           | hs-cTnT high and hs-cTnl low                      | 1.28 (0.83-1.98)   |
|                           | hs-cTnT high and hs-cTnl low                      | 1.97 (1.36-2.84)   |
|                           | hs-cTnT and hs-cTnl high                          | 3.14 (2.32-4.20)   |
|                           | <b>AMI</b>                                        |                    |
|                           | both hs-cTnT and hs-cTnl low (reference category) |                    |
|                           | hs-cTnT high and hs-cTnl low                      | 1.58 (0.79-3.15)   |
|                           | hs-cTnT high and hs-cTnl low                      | 2.77 (1.48-5.16)   |
|                           | hs-cTnT and hs-cTnl high                          | 2.99 (1.75-5.03)   |

**Table S8 (continued)**

| <b>publication</b>           | <b>main findings</b>                                        |                                                                 |
|------------------------------|-------------------------------------------------------------|-----------------------------------------------------------------|
| Hijazi 2015 <sup>20</sup>    | <b>outcome and groups**</b>                                 | <b>HR (95% CI)</b>                                              |
|                              | <b>ischemic stroke/systemic embolism/AMI/ CVD mortality</b> |                                                                 |
|                              | both hs-cTnT and hs-cTnI low (reference category)           |                                                                 |
|                              | hs-cTnT high and hs-cTnI low                                | 1.21 (0.90-1.64)                                                |
|                              | hs-cTnT high and hs-cTnI low                                | 1.68 (1.29-2.18)                                                |
|                              | hs-cTnT and hs-cTnI high                                    | 2.50 (2.04-3.07)                                                |
|                              | <b>major bleeding</b>                                       |                                                                 |
|                              | both hs-cTnT and hs-cTnI low (reference category)           |                                                                 |
|                              | hs-cTnT high and hs-cTnI low                                | 1.69 (1.30-2.18)                                                |
|                              | hs-cTnT high and hs-cTnI low                                | 1.41 (1.06-1.87)                                                |
|                              | hs-cTnT and hs-cTnI high                                    | 1.54 (1.24-1.91)                                                |
| deFilippi 2012 <sup>21</sup> | <b>outcome and hs-cTn assay</b>                             | <b>risk-factor adjusted <math>\beta</math> (<i>p</i>-value)</b> |
|                              | <b>CAC</b>                                                  |                                                                 |
|                              | hs-cTnI (continuous)                                        | -0.15 ( <i>p</i> = 0.09)                                        |
|                              | hs-cTnT (continuous)                                        | -0.15 ( <i>p</i> = 0.15)                                        |

**Table S8 (continued)**

| <b>publication</b>           | <b>main findings</b>            | <b>risk-factor adjusted <math>\beta</math> (<i>p</i>-value)</b> |
|------------------------------|---------------------------------|-----------------------------------------------------------------|
| deFilippi 2012 <sup>21</sup> | <b>outcome and hs-cTn assay</b> |                                                                 |
|                              | <b>LVMI</b>                     |                                                                 |
|                              | hs-cTnI (continuous)            | 0.36 ( <i>p</i> < 0.001)                                        |
|                              | hs-cTnT (continuous)            | 0.36 ( <i>p</i> = 0.004)                                        |

\* Definitions of “low” and “high” hs-cTn categories were based on the sex-specific 75th percentiles of hs-cTnI and hs-cTnT (hs-cTnI, women: 2.8 ng/L; hs-cTnI, men: 4.2 ng/L; hs-cTnT, women: 3.9 ng/L; hs-cTnT, men: 5.6 ng/L). \*\* Definitions of “low” and “high” hs-cTn categories were based on the median of hs-cTnI and hs-cTnT (hs-cTnI: 6.3 ng/L ; hs-cTnT; 17.0 ng/L). Abbreviations: AF, atrial fibrillation; AMI, acute myocardial infarction; CAC, coronary artery calcification; CAD, coronary artery disease; CKD, chronic kidney disease; CVD, cardiovascular disease; hs-cTnI, high-sensitivity cardiac troponin I; hs-cTnT, high-sensitivity cardiac troponin T; HR, hazard ratio; LVMI, left ventricular mass index.
